# Supplementary material for: Merging enzymatic and synthetic chemistry with computational synthesis planning
Source: Springer Nature journal article supplement (doi:10.1038/s41467-022-35422-y), 2022-12-14
Supplement: MOESM1 [file 41467_2022_35422_MOESM1_ESM.pdf]

Supplementary information

# **Merging enzymatic and synthetic chemistry with computational synthesis planning**

Itai Levin, Mengjie Liu, Christopher A. Voigt, and Connor W. Coley

**Supplementary Information** for Manuscript titled “**Merging enzymatic and synthetic chemistry with computational synthesis planning**” by Itai Levin, Mengjie Liu, Christopher A. Voigt & Connor W. Coley

## **Contents**

|                                                                                                                                                                         |           |
|-------------------------------------------------------------------------------------------------------------------------------------------------------------------------|-----------|
| <b>Supplementary Figure 1: Additional information from comparison of chemistry captured by the Reaxys and BKMS template sets</b> .....                                  | <b>2</b>  |
| <b>Supplementary Table 1: Precedent examples for aryl bromination reaction template</b> .....                                                                           | <b>3</b>  |
| <b>Supplementary Figure 2: Data for the suggested enzymatic bromination of tryptoline</b> .....                                                                         | <b>4</b>  |
| <b>Supplementary Table 2: Parameters used for full synthesis plan searches</b> .....                                                                                    | <b>5</b>  |
| <b>Supplementary Table 3: Automatically determined cofactor pairs</b> .....                                                                                             | <b>6</b>  |
| <b>Supplementary Figure 3: Molecules for which all routes found required a transformation that could not be described by the synthetic chemistry template set</b> ..... | <b>9</b>  |
| <b>Supplementary Figure 4: Molecules for which routes were found with a hybrid search but not with a fully synthetic or fully enzymatic search</b> .....                | <b>9</b>  |
| <b>Supplementary Figure 5: Screenshot of synthesis route identified for dronabinol ((-)-1)</b> .....                                                                    | <b>10</b> |
| <b>Supplementary Figure 6: Screenshots for the 6 shortest hybrid synthesis routes identified for arformoterol ((R,R)-2)</b> .....                                       | <b>11</b> |
| <b>Supplementary Figure 7: Retrosynthesis prediction accuracy on test set as a function of number of training examples seen for a template</b> .....                    | <b>17</b> |
| <b>Supplementary Figure 8: Accuracy metrics during training of the enzymatic one-step model</b> .....                                                                   | <b>18</b> |
| <b>Supplementary Figure 9: Number of nodes explored for multi-step retrosynthetic search with different search strategies</b> .....                                     | <b>19</b> |
| <b>Supplementary Figure 10: Comparing interactive retrosynthetic search results to experimental pathways for islatravir and sitagliptin</b> .....                       | <b>20</b> |
| <b>References</b> .....                                                                                                                                                 | <b>22</b> |

## Supplementary Figure 1: Additional information from comparison of chemistry captured by the Reaxys and BKMS template sets

### a Examples of reactions from BKMS that were captured by the Reaxys template set

1. Phosphate butyryltransferase (E.C. 2.3.1.19)

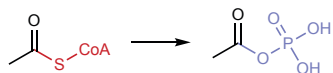

2. Myrcene synthase (E.C. 4.2.3.15)

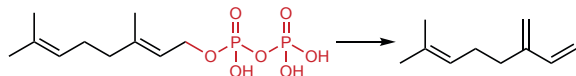

3. Pantoate β-alanine ligase

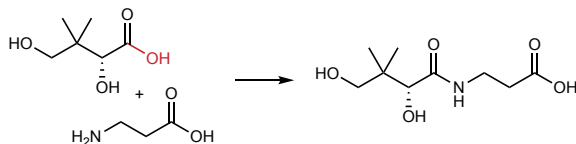

4. Methane monooxygenase (E.C. 1.14.18.3)

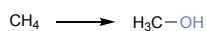

5. 2-ketoarginine methyltransferase (E.C. 2.1.1.243)

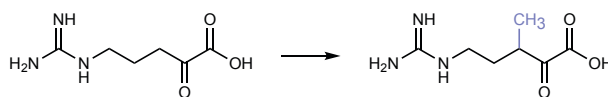

6. Synephrinum dehydratase (E.C. 4.2.1.88)

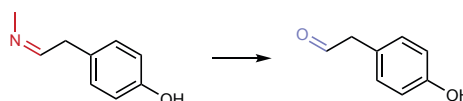

### b Example of reaction templates corresponding to the transformation of a thioester to a thiol in the Reaxys template set:

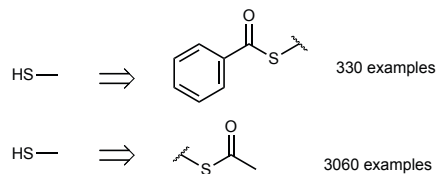

**Supplementary Table 1: Precedent examples for aryl bromination reaction template**

| EC Number  | Enzyme Name                                   | Reaction                                                                                                  | SMILES                                                                                       | Reaction Tanimoto Similarity | Database IDs <sup>a</sup>                           |
|------------|-----------------------------------------------|-----------------------------------------------------------------------------------------------------------|----------------------------------------------------------------------------------------------|------------------------------|-----------------------------------------------------|
| 1.14.19.58 | tryptophan 5-halogenase                       | L-tryptophan + FADH2 + Br- + O2 + H+ = 5-bromo-L-tryptophan + FAD + 2 H2O                                 | Br.N[C@@H](Cc1c[nH]c2ccccc12)C(=O)O>>N[C@@H](Cc1c[nH]c2ccc(Br)cc12)C(=O)O                    | 0.657                        | B: BS389070;<br>K: None;<br>M: None;<br>S: None     |
| 1.97.1     |                                               | Monobromobisphenol A <=> Bisphenol A + Hydrobromic acid                                                   | Br.CC(C)(c1ccc(O)cc1)c1ccc(O)cc1>>CC(C)(c1ccc(O)cc1)c1ccc(O)c(Br)c1                          | 0.521                        | B: None;<br>K: R06879;<br>M: None;<br>S: None       |
| 1.97.1     |                                               | Dibromobisphenol A <=> Monobromobisphenol A + Hydrobromic acid                                            | Br.CC(C)(c1ccc(O)cc1)c1ccc(O)c(Br)c1>>CC(C)(c1ccc(O)c(Br)c1)c1ccc(O)c(Br)c1                  | 0.499                        | B: None;<br>K: R06878;<br>M: None;<br>S: None       |
| 1.97.1     |                                               | Tribromobisphenol A <=> Dibromobisphenol A + Hydrobromic acid                                             | Br.CC(C)(c1ccc(O)c(Br)c1)c1ccc(O)c(Br)c1>>CC(C)(c1ccc(O)c(Br)c1)c1ccc(Br)c(O)c(Br)c1         | 0.492                        | B: None;<br>K: R06877;<br>M: None;<br>S: None       |
| 1.97.1     |                                               | Tetrabromobisphenol A <=> Tribromobisphenol A + Hydrobromic acid                                          | Br.CC(C)(c1ccc(O)c(Br)c1)c1cc(Br)c(O)c(Br)c1>>CC(C)(c1cc(Br)c(O)c(Br)c1)c1ccc(Br)c(O)c(Br)c1 | 0.489                        | B: None;<br>K: R06876;<br>M: None;<br>S: None       |
| 1.14.19.55 | 4-hydroxybenzoate brominase (decarboxylating) | 3,4-Dihydroxybenzoate + NADPH + Bromide + Oxygen + 2 H+ <=> 3-Bromo-4,5-dihydroxybenzoate + NADP+ + 2 H2O | Br.O=C(O)c1ccc(O)c(O)c1>>O=C(O)c1cc(O)c(O)c(Br)c1                                            | 0.444                        | B: BR52355;<br>K: None;<br>M: RXN-19112;<br>S: None |
| 1.14.19.55 | 4-hydroxybenzoate brominase (decarboxylating) | 4-hydroxybenzoate + NADPH + bromide + O2 + H+ = 3-bromo-4-hydroxybenzoate + NADP+ + 2 H2O                 | Br.O=C(O)c1ccc(O)cc1>>O=C(O)c1ccc(O)c(Br)c1                                                  | 0.385                        | B: BR52352;<br>K: None;<br>M: RXN-19061;<br>S: None |
| 1.14.19.55 | 4-hydroxybenzoate brominase (decarboxylating) | 2,4-dibromophenol + bromide + oxygen + NADPH + H+ = 2,4,6-tribromophenol + H2O + NADP+                    | Br.Oc1ccc(Br)cc1Br>>Oc1c(Br)cc(Br)cc1Br                                                      | 0.357                        | B: None;<br>K: None;<br>M: RXN-19104;<br>S: None    |

<sup>a</sup>B=Brenda, K=KEGG, M=Metacyc, S=Sabio-RK

**Supplementary Figure 2: Data for the suggested enzymatic bromination of tryptoline**  
**a** Screenshot of partial BRENDA entry for E.C. 1.14.19.58

| SUBSTRATE ▲▼                                      | PRODUCT ▲▼                                                              | REACTION DIAGRAM | ORGANISM ▲▼                       | UNIPROT ▲▼ | COMMENTARY (Substrate) ▲▼                                                                                                                           | LITERATURE (Substrate) ▲▼ |
|---------------------------------------------------|-------------------------------------------------------------------------|------------------|-----------------------------------|------------|-----------------------------------------------------------------------------------------------------------------------------------------------------|---------------------------|
| 3-indolepropionate + FADH2 + chloride + O2 + H+   | 6-chloro-3-indolepropionate + 5-chloro-3-indolepropionate + FAD + 2 H2O | ↷                | Streptomyces toxytricini          | E9P162     | 57% conversion by the wild-type enzyme, 75% 5-chlorination is by mutant L460F/P461E/P462T in comparison to 90% 6-chlorination by the wild-type SthH | 744705                    |
| anthranilamide + FADH2 + chloride + O2 + H+       | 5-chloro-anthranilamide + FAD + 2 H2O                                   | ↷                | Streptomyces toxytricini          | E9P162     | 43% conversion by the wild-type enzyme                                                                                                              | 744705                    |
| anthranilate + FADH2 + chloride + O2 + H+         | 5-chloro-anthranilate + FAD + 2 H2O                                     | ↷                | Streptomyces toxytricini          | E9P162     | 1.1% conversion by the wild-type enzyme                                                                                                             | 744705                    |
| indole-3-acetic acid + FADH2 + chloride + O2 + H+ | 5-chloroindole-3-acetic acid + FAD + 2 H2O                              | ↷                | Streptomyces rugosporus           | A4D0H5     | -                                                                                                                                                   | 744720                    |
| kynurenine + FADH2 + chloride + O2 + H+           | 5-chloro-kynurenine + FAD + 2 H2O                                       | ↷                | Streptomyces toxytricini          | E9P162     | 79% conversion by the wild-type enzyme                                                                                                              | 744705                    |
| L-tryptophan + FADH2 + Br- + O2 + H+ ☐            | 5-bromo-L-tryptophan + FAD + 2 H2O                                      | ↷                | Streptomyces rugosporus           | -          | -                                                                                                                                                   | 687866, 711742            |
|                                                   |                                                                         |                  | Streptomyces rugosporus           | A4D0H5     | brominating activity is about 75% of the chlorinating activity                                                                                      | 673021                    |
|                                                   |                                                                         |                  | Streptomyces rugosporus LL-42D005 | A4D0H5     | brominating activity is about 75% of the chlorinating activity                                                                                      | 673021                    |

**b** Amino acid sequence for PyrH (UniProt A4D0H5)

```
>tr|A4D0H5|A4D0H5_STRRG Tryptophan 5-halogenase OS=Streptomyces rugosporus
OX=295838 GN=pyrH PE=1 SV=1
MIRSVVIVGGGTAGWMTASYLKAADFDDRIDVTLVESGNVRRIGVGEATFSTVRHFFDYLG
LDEREWLPRCAGGYKLGIRFENWSEPGEYFYHPPFERLRVVDGFNMAEWLAVGDRRTSFS
EACYLTHRLCEAKRAPRMLDGS L FASQVDESLGRSTLAEQRAQFPYAYHFD ADEVARYLS
EYAIARGVVRHVVDVQHVQDERGWI SGVHTKQHG E I SGDLFVDCTGFRGLLINQTLGGR
FQSFSDVLPNNRAVALRVPRENDEDMRPYTTATAMSAGMWTIPLFKRDGNGYVYSDEFI
SPEEAERELRSTVAPGRDDLEANHIQMRIGRNERTWINNCVAVGLSAAFVEPLESTGIFF
IQHAIEQLVKHFPGERWDPVLI SAYNERMAHMVDGVKEFLVLHYKGAQREDTPYWKA AKT
RAMPDGLARKLELSASHLLDEQTIYPYYHGFETYSWITMNLGLGIVPERPRPALLHMDPA
PALAEFERLRREGDELIAALPSCYEYLA SIQ
```

**c** Amino acid sequence for RebH (UniProt Q8KHZ8)

```
>sp|Q8KHZ8|REBH_LENAE Flavin-dependent tryptophan halogenase RebH OS=Lentzea
aerocolonigenes OX=68170 GN=rebH PE=1 SV=1
MSGKIDKILIVGGGTAGWMAASYLGKALQGTADITLLQAPDIPTLGVGEATIPNLQTAFF
DFLGIPEDWRECNASYKVAIKFINWRTAGEGTSEARELDGGPDH FYHSFGLLKYHEQI
PLSHYWFRDRSYRGKTVPEFDYACYKEPVILDANRSPRRLDGSKVTNYAWHFD AHLVADFL
RRFATEKLGVRHVEDRVEHVQRDANGNIESVRTATGRVFDADLFVDCSGFRGLLINKAME
EPFLDMSDHLNDSAVATQVPHDDDANGVEPFTSAIAMKSGWTWKIPMLGRFGTGYVYSS
RFATEDEAVREFCEMWHLDPETQPLNRIRFRVGRNRRRAWVGNVCV SIGTSSCFVEPLESTG
IYFVYAALYQLVKHFDPKSLNPVLTARFNREIETMFDDTRDFIQAHFYFSPRTDTPFWRA
NKELRLADGMQEKIDMYRAGMAINAPASDDAQLYYGNFEEEF RNFWNNSNYCVLAGLGL
VPDAPSPRLAHMPQATESVDEVF GAVKDRQRN LLETLP SLHEFLRQQHGR
```

**Supplementary Table 2: Parameters used for full synthesis plan searches**

|                         |        |
|-------------------------|--------|
| <i>expansion_time</i>   | 180    |
| <i>filter_threshold</i> | 0.0    |
| <i>max_cum_prob</i>     | 0.9999 |
| <i>return_first</i>     | false  |
| <i>max_depth</i>        | 10     |
| <i>template_count</i>   | 1000   |
| <i>max_branching</i>    | 25     |
| <i>max_ppg</i>          | 100    |
| <i>return_graph</i>     | true   |

### Supplementary Table 3: Automatically determined cofactor pairs

If a molecule from the column Cofactor 1 and at least one of the molecules from the column Cofactor 2 were present on opposite sides of a reaction, both were removed before converting the reaction into SMILES strings. All names were converted to lower case to increase consistency.

| Cofactor 1                                | Cofactor 2                                   |
|-------------------------------------------|----------------------------------------------|
| (2e,6e)-farnesyl diphosphate              | diphosphate                                  |
| gdp-beta-l-fucose                         | gdp                                          |
| ferricytochrome c                         | ferrocytochrome c                            |
| malonyl-[acp]                             | soluble [acyl-carrier protein], co2          |
| reduced adrenodoxin                       | h2o, oxidized adrenodoxin                    |
| acceptor                                  | reduced acceptor                             |
| gdp-alpha-d-mannose                       | gdp                                          |
| udp-alpha-d-glucose                       | udp                                          |
| fmnh2                                     | fmn                                          |
| dimethylallyl diphosphate                 | diphosphate                                  |
| protein n(pi)-phospho-l-histidine         | protein histidine                            |
| oxidized ferredoxin [iron-sulfur] cluster | h+, reduced ferredoxin [iron-sulfur] cluster |
| udp-d-glucuronate                         | udp                                          |
| reduced [nadph-hemoprotein reductase]     | h2o, oxidized [nadph-hemoprotein reductase]  |
| oxidized ferredoxin                       | reduced ferredoxin                           |
| udp-galactose                             | udp                                          |
| udp-glucuronate                           | udp                                          |
| udp-glucose                               | udp                                          |
| electron-transfer quinone                 | electron-transfer quinol                     |
| ferrocytochrome b5                        | ferricytochrome b5, h2o                      |
| udp-n-acetyl-d-glucosamine                | udp                                          |
| [hpr protein]-npi-phospho-l-histidine     | [hpr]-l-histidine                            |
| nadph                                     | nadp+                                        |
| 3'-phosphoadenylylsulfate                 | adenosine 3',5'-bisphosphate                 |
| 3'-phosphoadenylyl sulfate                | adenosine 3',5'-bisphosphate                 |
| [protein]-npi-phospho-l-histidine         | [protein]-l-histidine                        |
| prenyl diphosphate                        | diphosphate                                  |
| (s)-methylmalonyl-coa                     | coenzyme a, nadp+, co2                       |
| dolichyl phosphate d-mannose              | dolichyl phosphate                           |
| oxidized unknown electron carrier         | reduced unknown electron carrier             |
| isopentenyl diphosphate                   | diphosphate                                  |
| electron-transfer flavoprotein            | reduced electron-transfer flavoprotein       |
| reduced acceptor                          | acceptor                                     |

|                                          |                                                 |
|------------------------------------------|-------------------------------------------------|
| fadh2                                    | fad                                             |
| udp-d-galactose                          | udp                                             |
| [reduced nadph-hemoprotein reductase]    | [oxidized nadph-hemoprotein reductase], h2o     |
| reduced unknown electron carrier         | oxidized unknown electron carrier               |
| nad+                                     | nadh                                            |
| udp-alpha-d-galactose                    | udp                                             |
| nadh                                     | nad+                                            |
| udp-alpha-d-xylose                       | udp                                             |
| nadp+                                    | nadph                                           |
| oxidized c-type cytochrome               | h+, reduced c-type cytochrome                   |
| hydrogen peroxide                        | oxygen, h2o                                     |
| 3'-phosphoadenylyl-sulfate               | adenosine 3,5'-bisphosphate                     |
| fad                                      | fadh2                                           |
| udp-beta-l-rhamnose                      | udp                                             |
| ah2                                      | h2o, a                                          |
| udp-n-acetyl-d-galactosamine             | udp                                             |
| reduced ferredoxin [iron-sulfur] cluster | oxidized ferredoxin [iron-sulfur] cluster       |
| reduced ferredoxin                       | oxidized ferredoxin                             |
| cmp-n-acetyl-beta-neuraminatate          | cmp                                             |
| cmp-n-acetylneuraminatate                | cmp                                             |
| udp-alpha-d-glucuronate                  | udp                                             |
| oxidized electron-transfer flavoprotein  | reduced electron-transfer flavoprotein          |
| udp-d-xylose                             | udp                                             |
| gdp-l-fucose                             | gdp                                             |
| na+                                      | na+                                             |
| [reduced nadph---hemoprotein reductase]  | [oxidized nadph---hemoprotein reductase], h2o   |
| ubiquinone                               | ubiquinol                                       |
| [hpr]-l-histidine                        | [hpr protein]-npi-phospho-l-histidine           |
| [protein]-l-histidine                    | [protein]-npi-phospho-l-histidine               |
| [oxidized nadph---hemoprotein reductase] | oxygen, [reduced nadph---hemoprotein reductase] |
| glutathione disulfide                    | glutathione                                     |
| protein histidine                        | protein n(pi)-phospho-l-histidine               |
| nicotinamide                             | nad+                                            |
| ferrocytochrome c                        | ferricytochrome c                               |
| ubiquinol                                | ubiquinone                                      |
| electron-transfer quinol                 | electron-transfer quinone                       |
| quinol                                   | quinone                                         |
| h2o2                                     | o2                                              |
| oxidized [nadph-hemoprotein reductase]   | oxygen, reduced [nadph-hemoprotein reductase]   |

|                                        |                                           |
|----------------------------------------|-------------------------------------------|
| reduced c-type cytochrome              | oxidized c-type cytochrome                |
| a                                      | ah2                                       |
| oxidized flavodoxin                    | reduced flavodoxin                        |
| s-adenosyl-l-homocysteine              | s-adenosyl-l-methionine                   |
| 5'-deoxyadenosine                      | s-adenosyl-l-methionine                   |
| 2'-o-acetyl-adp-ribose                 | nad+                                      |
| adp                                    | atp                                       |
| ferricytochrome b5                     | h+, ferrocyclochrome b5                   |
| [oxidized nadph-hemoprotein reductase] | [reduced nadph-hemoprotein reductase], o2 |

Additionally, all of the following entities were removed:

h+, e-, atp, hnu, h2o, water, oxygen, o2, adp, amp, phosphate, diphosphate, co2, sodium, na+, ammonium, nh3

### Supplementary Figure 3: Molecules for which all routes found required a transformation that could not be described by the synthetic chemistry template set

Molecules from the ZINC boutique subset. Routes were identified for these molecules when the retrosynthetic search was performed using both the enzymatic and synthetic template prioritizers but not when the search was performed with only the synthetic template prioritizer. Additionally, all of the routes found for these molecules required at least one reaction that could not be described by the set of synthetic reaction rules from Reaxys.

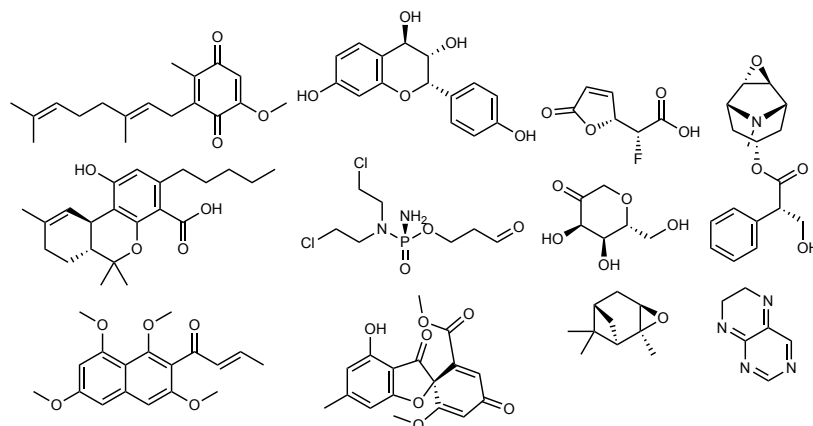

### Supplementary Figure 4: Molecules for which routes were found with a hybrid search but not with a fully synthetic or fully enzymatic search

Molecules from the ZINC boutique subset. Routes were identified for these molecules when the retrosynthetic search was performed using both the enzymatic and synthetic template prioritizers but not when the search was performed with only one template prioritizer at once.

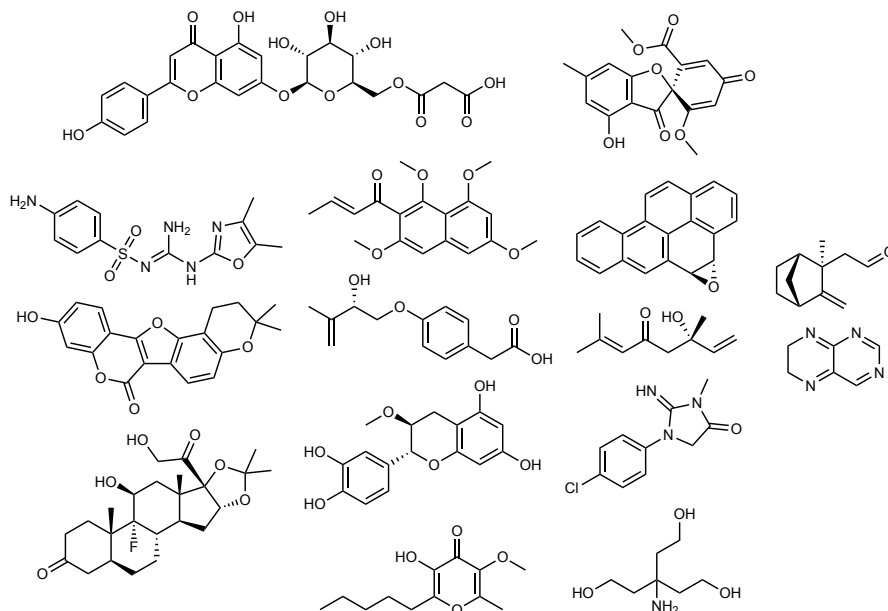

## Supplementary Figure 5: Screenshot of synthesis route identified for dronabinol ((-)-1)

The synthesis route is visualized in the ASKCOS graphical user interface (GUI). One synthesis tree is displayed at a time. Molecule nodes are framed in red if they are not in the buyable database, and yellow if they are in the buyable database. In this image, the final reaction node is selected (highlighted in blue in the left pane), and the corresponding information is shown in the pane on the right. “bkms” under “Supporting templates” indicates that the precedent for this reaction is from the BKMS database. The template ID written in blue text links to additional information about the template.

ASKCOS Modules Help My Results My Banlist Server Status Support Settings

### Tree Builder Visualization

Click to view the [top 25](#) or [all](#) pathways at once in the interactive path planner (expect slow rendering times when clicking 'all')

After expanding 1575 total chemicals and 2169 total reactions (with 3 banned reactions, 0 banned chemicals)

**Settings**

Sort trees by: Fewest Reactions Best first step Average score Average plausibility Best worst step

#### Synthetic pathway

Tree 1 of 30

<< First < Previous Next > Last >>

#### Pathway details

**Smiles:**  
CCCCC1c(c(O)c(C/C=C(\C)CCC=C(C)C)c(O)c1>>CCCCC1c(c(O)c2c(c1)OC(C)(C)[C@H]1CCC(C)=C[C@H]1)2)1

**Plausibility:** 1.000  
**Template score:** 0.072  
**Template examples:** 1  
**Necessary reagent:**  
**Supporting templates:**

- [bkms 7338399ef91e997c50b8b6d777b34cc3](#)

[Evaluate reaction](#)

**Ban**

ASKCOS version: chemoenzymatic Copyright © 2022. Last updated 2022-06-14. Created using Django.

## Supplementary Figure 6: Screenshots for the 6 shortest hybrid synthesis routes identified for arformoterol ((R,R)-2)

The synthesis routes are visualized with the ASKCOS graphical user interface. While the routes vary in length and starting materials, they follow a common synthesis logic described in the main text. Molecules were redrawn in ChemDraw and pasted on the screenshots for higher image resolution.

### Synthetic pathway

Tree 1 of 18

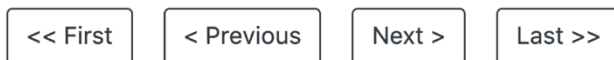

### Pathway details

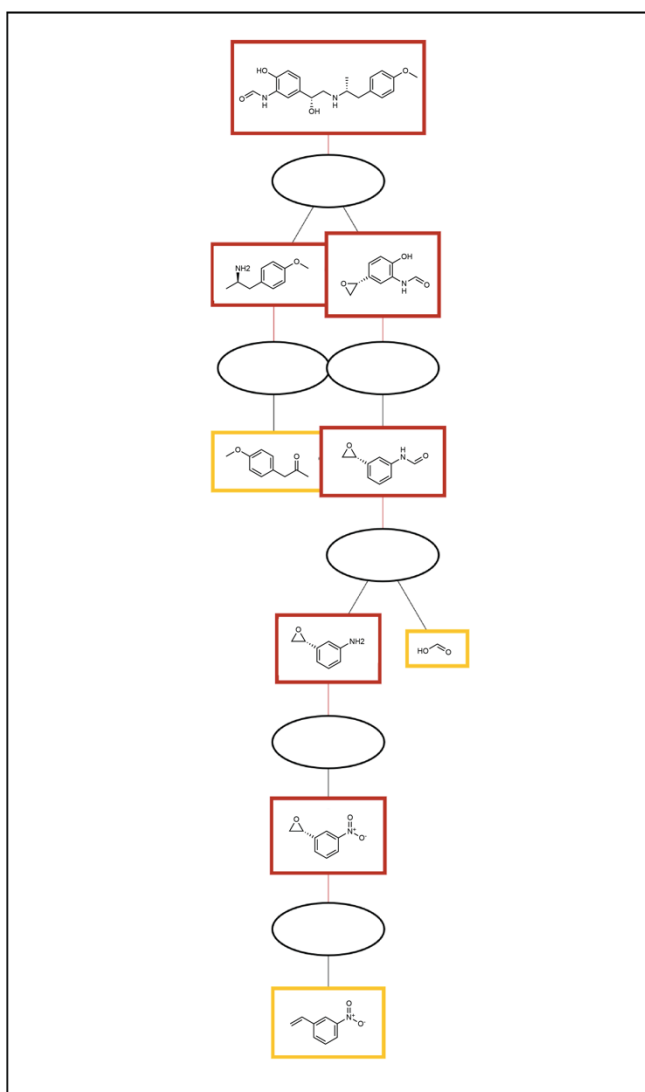

Click on a chemical or reaction on the left to view more details.

Ban

ASKCOS version: chemoenzymatic Copyright © 2022. Last updated

# Synthetic pathway

Tree 2 of 18

<< First

< Previous

Next >

Last >>

## Pathway details

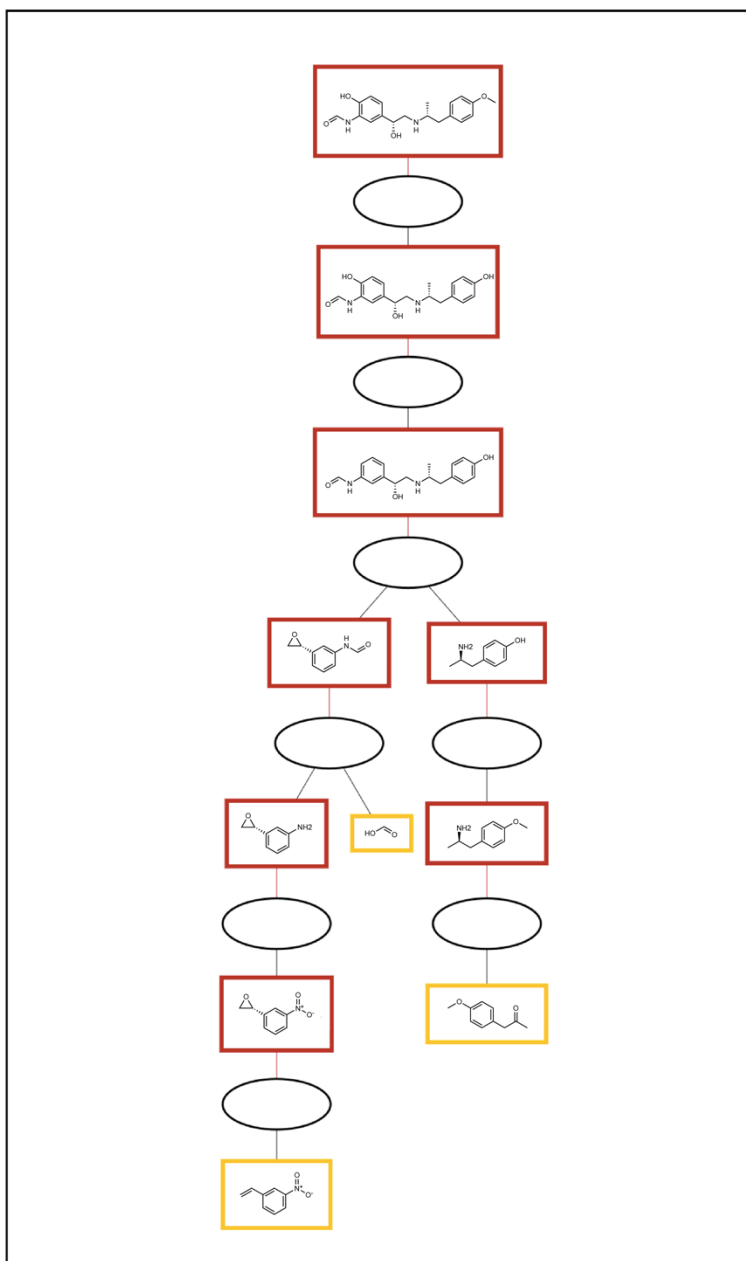

Click on a chemical or reaction on the left to view more details.

Ban

# Synthetic pathway

Tree 3 of 18

<< First   < Previous   **Next >**   Last >>

## Pathway details

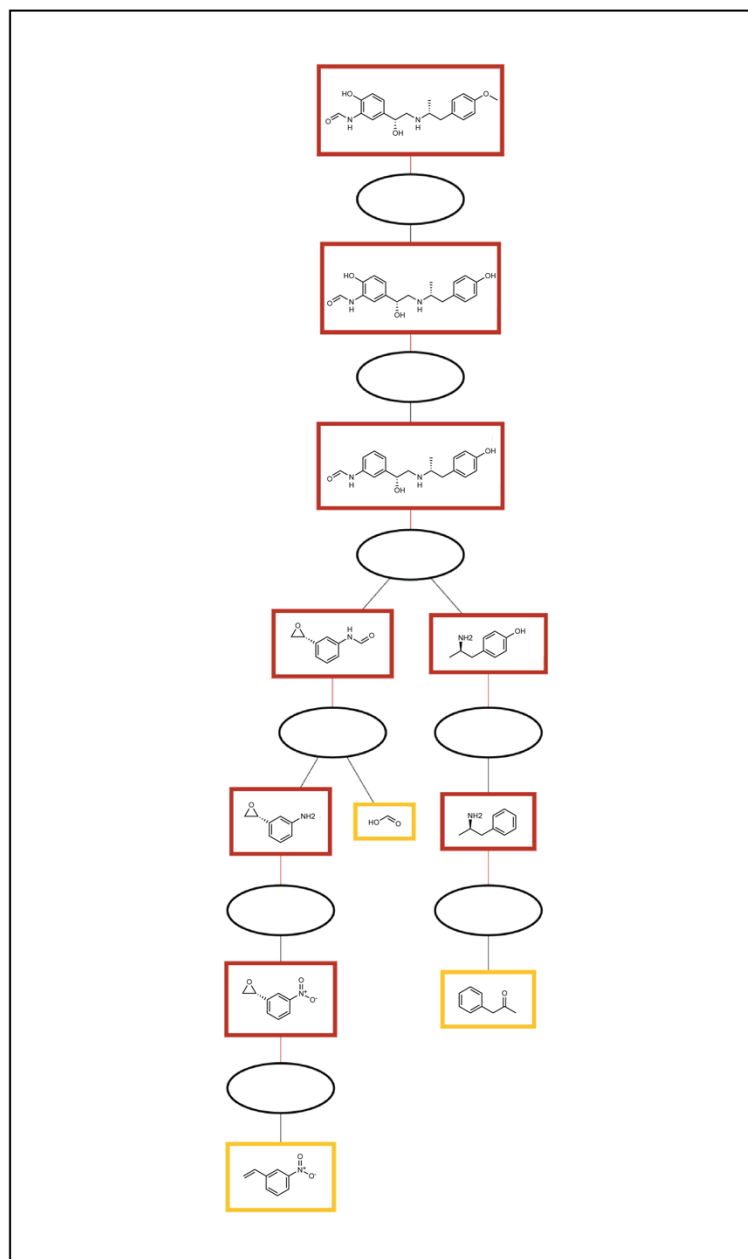

Click on a chemical or reaction on the left to view more details.

Ban

# Synthetic pathway

Tree 4 of 18

<< First   < Previous   **Next >**   Last >>

## Pathway details

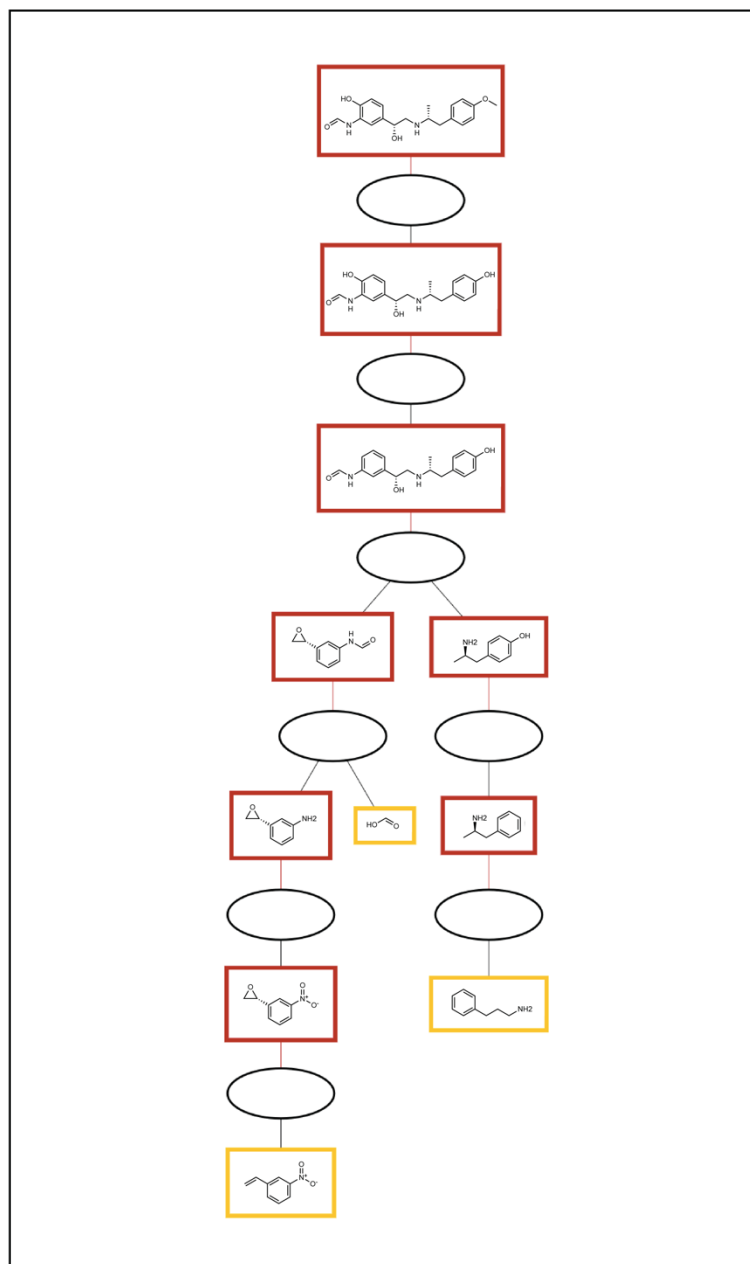

Click on a chemical or reaction on the left to view more details.

Ban

# Synthetic pathway

Tree 5 of 18

<< First   < Previous   **Next >**   Last >>

## Pathway details

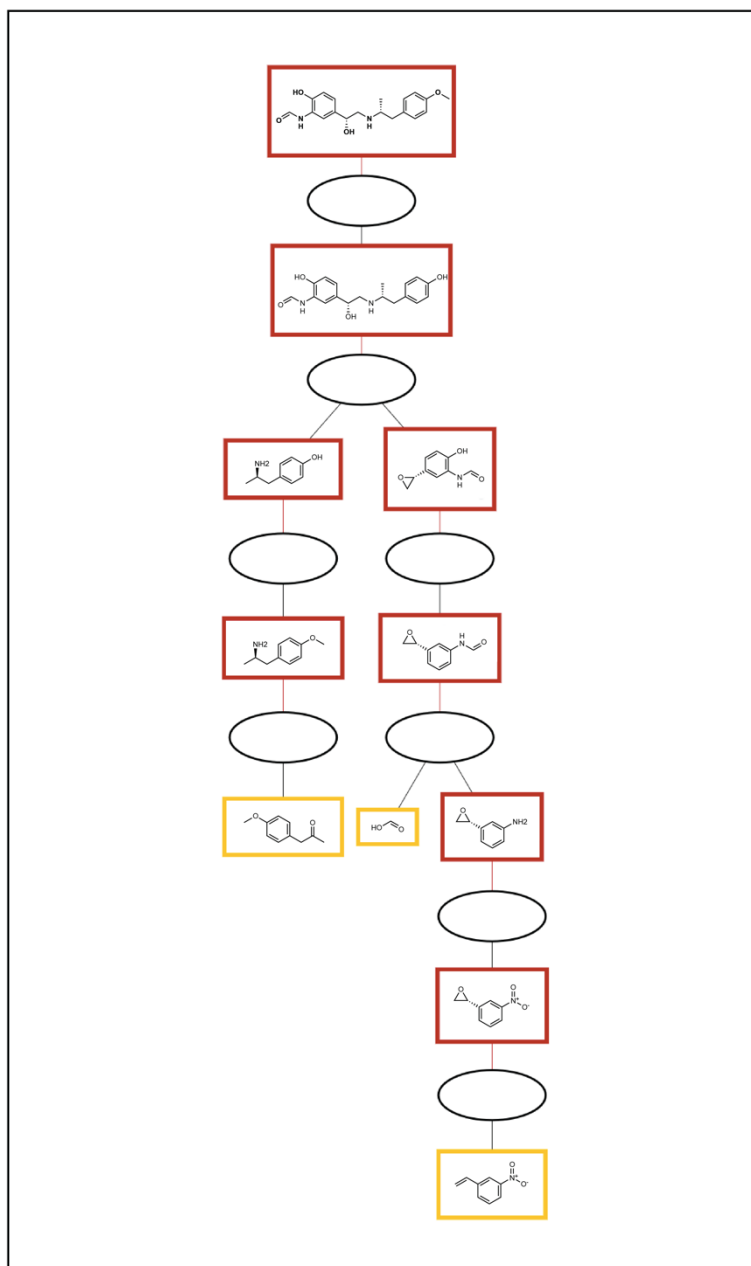

Click on a chemical or reaction on the left to view more details.

Ban

# Synthetic pathway

Tree 6 of 18

<< First   < Previous   **Next >**   Last >>

## Pathway details

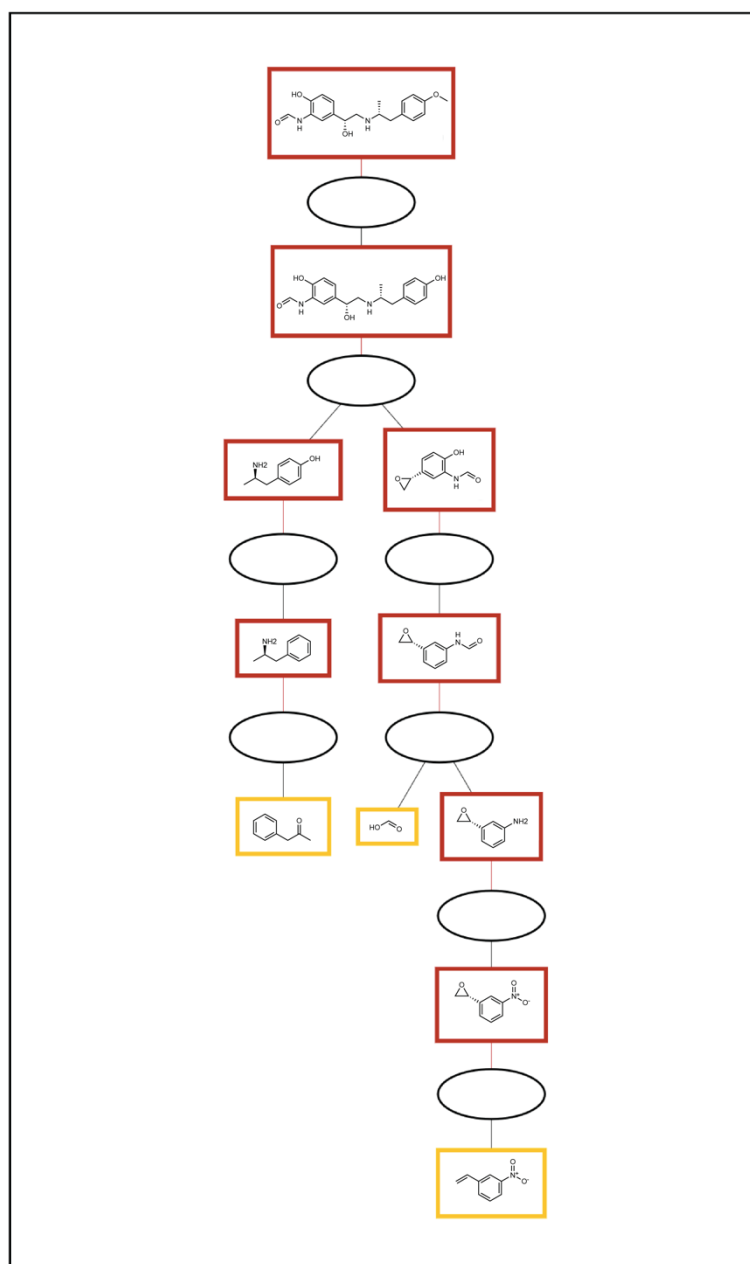

Click on a chemical or reaction on the left to view more details.

Ban

### Supplementary Figure 7: Retrosynthesis prediction accuracy on test set as a function of number of training examples seen for a template

The reaction data are the 15,309 reactions from BKMS labeled with 7,984 extracted templates. The evaluation was performed with a neural network model trained on 80% of the reactions and tested on 10% of the reactions where the data was split into train, validation, and test splits using a stratified split. The accuracies are reported as the fraction of molecules whose template is seen a given number of times during training where the template is ranked among the top-k templates by the template prioritizer model. The pretrained model was first trained to predict template applicability for each product molecule whereas the baseline model was not. The dashed lines represent the overall accuracies of each model.

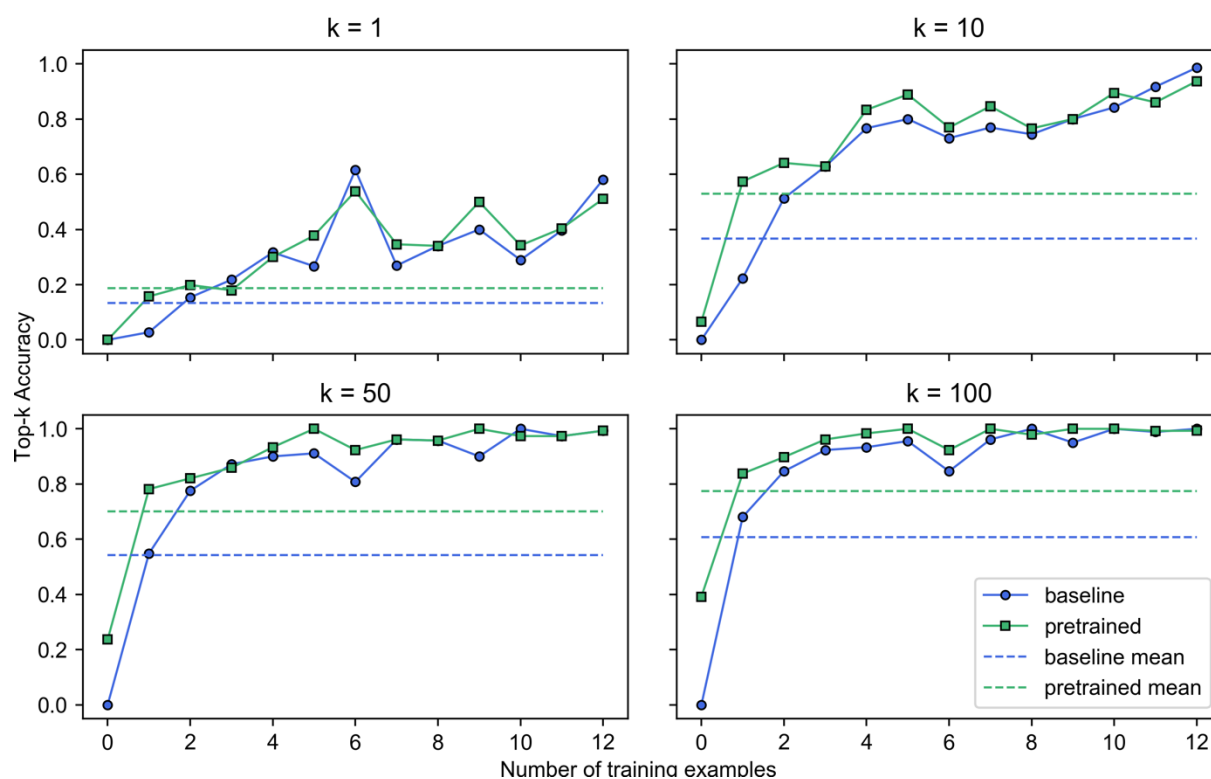

### Supplementary Figure 8: Accuracy metrics during training of the enzymatic one-step model

Metrics during training of the single-step enzymatic retrosynthesis network trained on 80% of the BKMS reaction data and validated on 10% of the data, pretrained on template applicability.

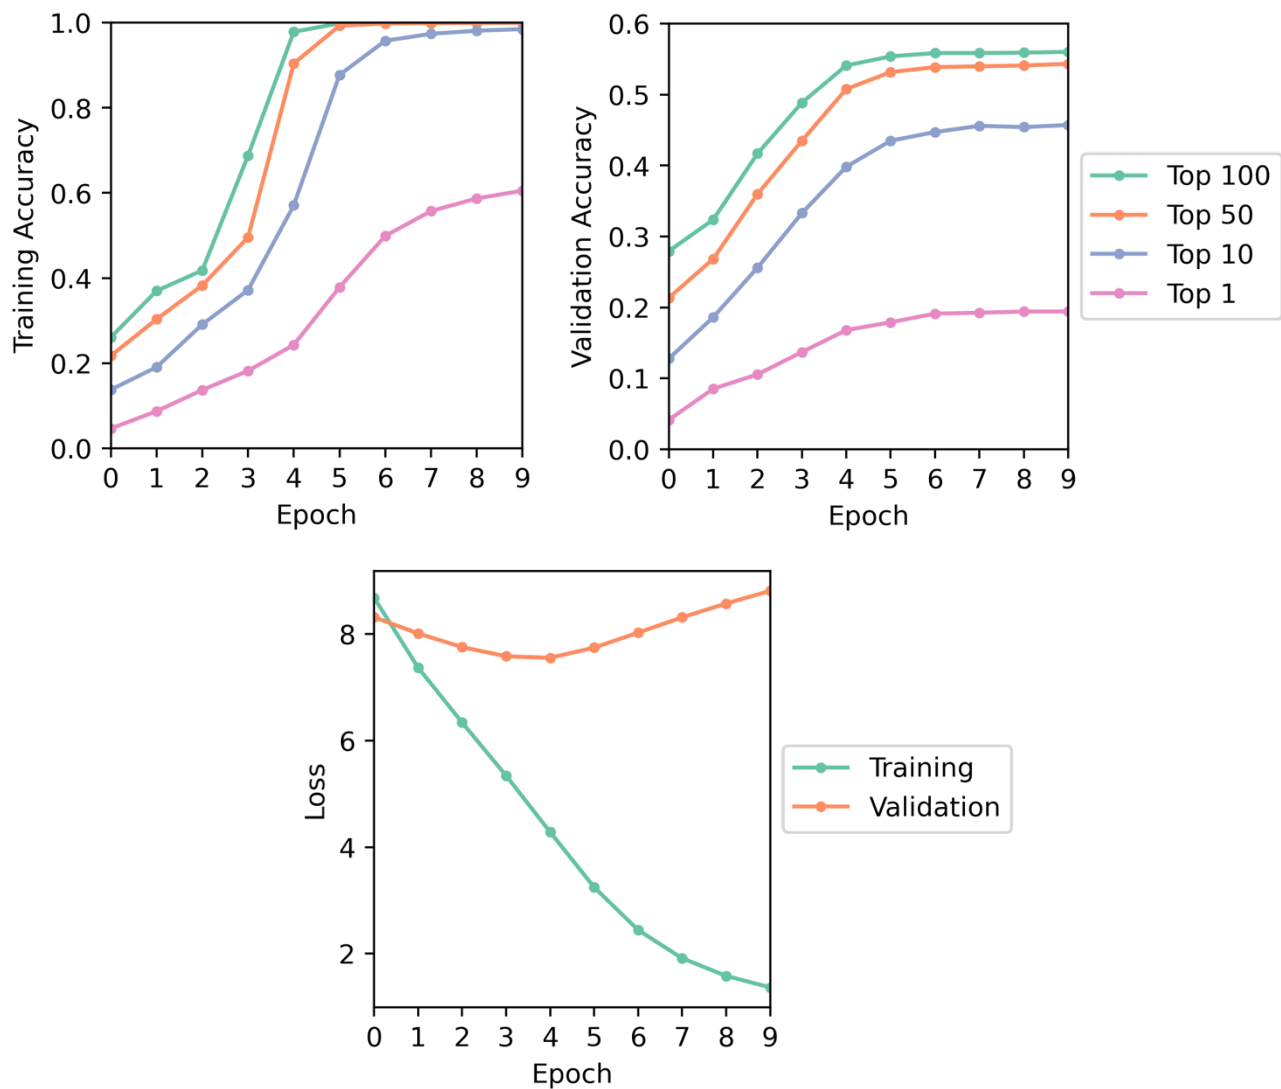

### Supplementary Figure 9: Number of nodes explored for multi-step retrosynthetic search with different search strategies

Mean number of chemical (a) and reaction (b) nodes explored in a 3-minute time-limited search with the parameters described in Supplementary Table 2 for 1,000 compounds from the ZINC boutique dataset. Error bars represent  $\pm 1$  standard deviation. We hypothesize that the enzymatic search explores more nodes both because the template prioritizer model is much smaller than the synthetic template prioritizer model, so more inference calls can be made within a given time limit, and it is possible that the enzymatic templates are less redundant, so less time is wasted re-exploring chemical nodes that have already been explored during the search.

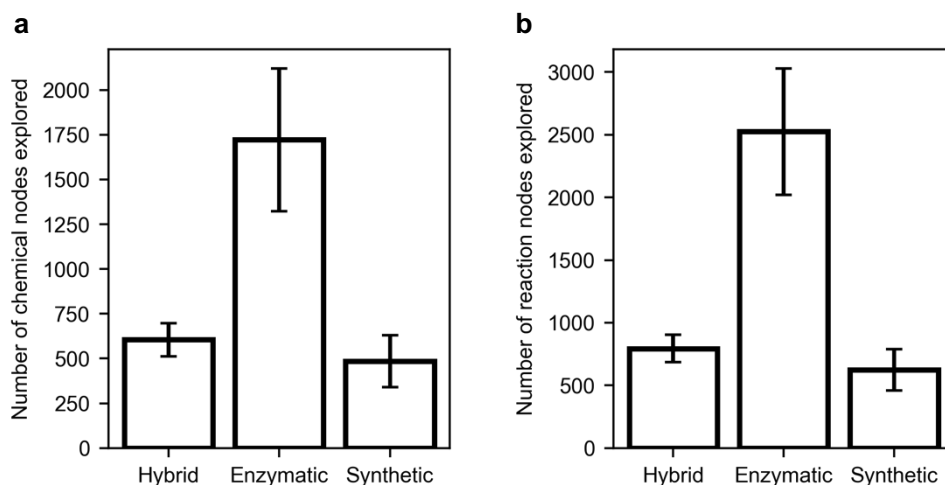

## Supplementary Figure 10: Comparing interactive retrosynthetic search results to experimental pathways for islatravir and sitagliptin

The rank of the individual steps from experimentally validated pathways is shown when using the synthetic (S), enzymatic (E), and both (hybrid, H) template prioritizer models to suggest precursors. “NA” indicates that none of the top-1000 ranked templates reproduce the reaction. The reported rank is the rank of the template which recovers the experimental step when templates that cannot be applied to the product are removed from the suggestions.

The top three suggested precursors when suggestions from the enzymatic and synthetic models are combined are shown below the experimental pathways. The substructure of the precursor that is different from the product is highlighted in red. If a template generates more than one precursor, only one precursor is depicted.

### a Sitagliptin reaction demonstrated by Savile et al.<sup>1</sup>

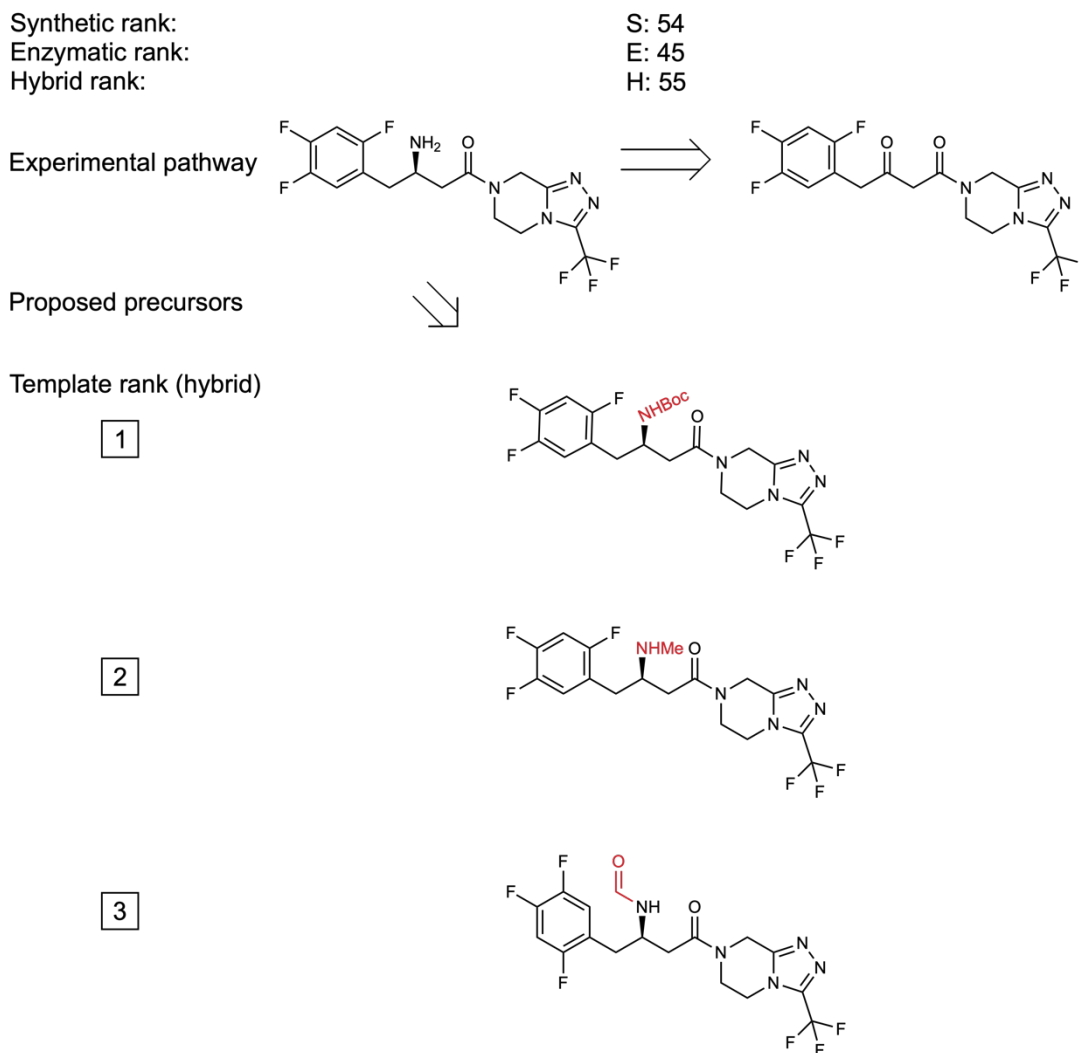

**b** Islatravir pathway demonstrated by Huffman et al.<sup>2</sup>

Stereochemistry was included at the C1 position for the precursor of the first retrosynthetic step when ranking the step for the synthetic model but not the enzymatic model to match the stereochemistry defined in the top-ranked templates from the respective template sets for the reaction. This discrepancy is minor and reasonable to catch in the interactive search context.

Synthetic rank:  
Enzymatic rank:  
Hybrid rank:

S: 149  
E: 8  
H: 16

S: NA  
E: 19  
H: 65

S: NA  
E: NA  
H: NA

Experimental pathway

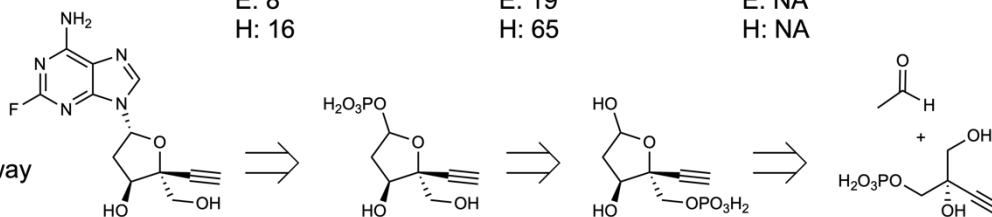

Proposed precursors

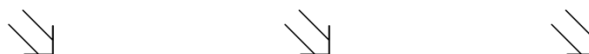

Template rank (hybrid)

1

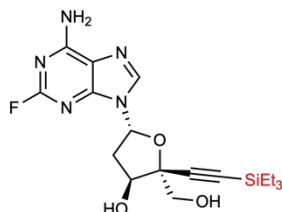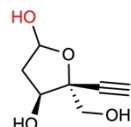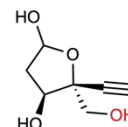

2

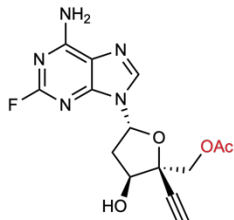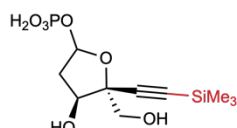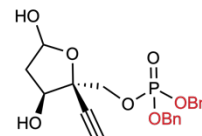

3

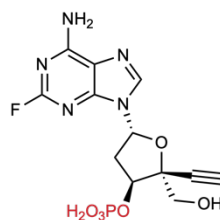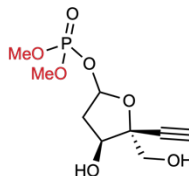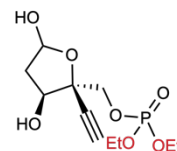

## References

- (1) Savile, C. K.; Janey, J. M.; Mundorff, E. C.; Moore, J. C.; Tam, S.; Jarvis, W. R.; Colbeck, J. C.; Krebber, A.; Fleitz, F. J.; Brands, J.; Devine, P. N.; Huisman, G. W.; Hughes, G. J. Biocatalytic Asymmetric Synthesis of Chiral Amines from Ketones Applied to Sitagliptin Manufacture. *Science* **2010**, *329* (5989), 305–309. <https://doi.org/10.1126/science.1188934>.
- (2) Huffman, M. A.; Fryszkowska, A.; Alvizo, O.; Borra-Garske, M.; Campos, K. R.; Canada, K. A.; Devine, P. N.; Duan, D.; Forstater, J. H.; Grosser, S. T.; Halsey, H. M.; Hughes, G. J.; Jo, J.; Joyce, L. A.; Kolev, J. N.; Liang, J.; Maloney, K. M.; Mann, B. F.; Marshall, N. M.; McLaughlin, M.; Moore, J. C.; Murphy, G. S.; Nawrat, C. C.; Nazor, J.; Novick, S.; Patel, N. R.; Rodriguez-Granillo, A.; Robaire, S. A.; Sherer, E. C.; Truppo, M. D.; Whittaker, A. M.; Verma, D.; Xiao, L.; Xu, Y.; Yang, H. Design of an in Vitro Biocatalytic Cascade for the Manufacture of Islatravir. *Science* **2019**, *366* (6470), 1255–1259. <https://doi.org/10.1126/science.aay8484>.
